# Supplementary material for: Synthesis and structural studies on (E)-3-(2,6-difluorophenyl)-1-(4-fluorophenyl)prop-2-en-1-one: a promising nonlinear optical material
Source: Royal Society of Chemistry journal article supplement (doi:10.1039/d0ra03634j), 2020-01-01
Supplement: d0ra03634j1.pdf [file d0ra03634j1.pdf]

## SUPPLEMENTARY MATERIAL

### **Synthesis and structural studies on (E)-3-(2,6-difluorophenyl)-1-(4-fluorophenyl)prop-2-en-1-one: a promising nonlinear optical material**

I.D. Borges<sup>1</sup>, J.A.V. Danielle<sup>1</sup>, V.E.G. Silva<sup>2</sup>, L.O. Sallum<sup>2</sup>, J.E. Queiroz<sup>2</sup>, L.D. Dias<sup>3</sup>, I. Iermak<sup>3</sup>, G.L.B. Aquino<sup>2</sup>, A.J. Camargo<sup>2</sup>, C. Valverde<sup>2,4</sup>, F.A.P. Osório<sup>5,6</sup>, B. Baseia<sup>5,7</sup> and H.B. Napolitano<sup>1,2,\*</sup>

<sup>1</sup>Laboratório de Novos Materiais, Centro Universitário de Anápolis, 75083-515, Anápolis, GO, Brazil

<sup>2</sup>Grupo de Química Teórica e Estrutural de Anápolis, Universidade Estadual de Goiás, 75001-970, Anápolis, GO, Brazil.

<sup>3</sup>São Carlos Institute of Physics, University of São Paulo, 13566-590, São Carlos, SP, Brazil.

<sup>4</sup>Laboratório de Modelagem Molecular Aplicada e Simulação, Universidade Paulista, 74845-090, Goiânia, GO, Brazil.

<sup>5</sup> Instituto de Física, Universidade Federal de Goiás, 74.690-900, Goiânia, GO, Brazil

<sup>6</sup> Pontifícia Universidade Católica de Goiás, 13566-590, Goiania, GO, Brazil

<sup>7</sup> Departamento de Física, Universidade Federal da Paraíba, 58051-970, João Pessoa, PB, Brazil.

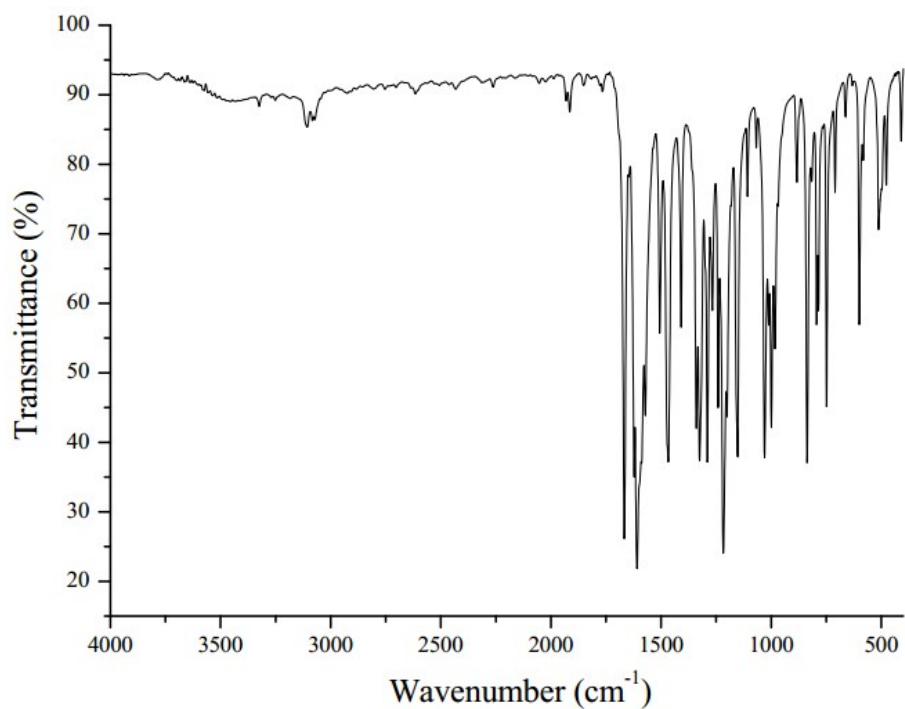

**Figure S1.** Infrared spectrum of *(E)*-3-(2,6-difluorophenyl)-1-(4-fluorophenyl)prop-2-en-1-one.

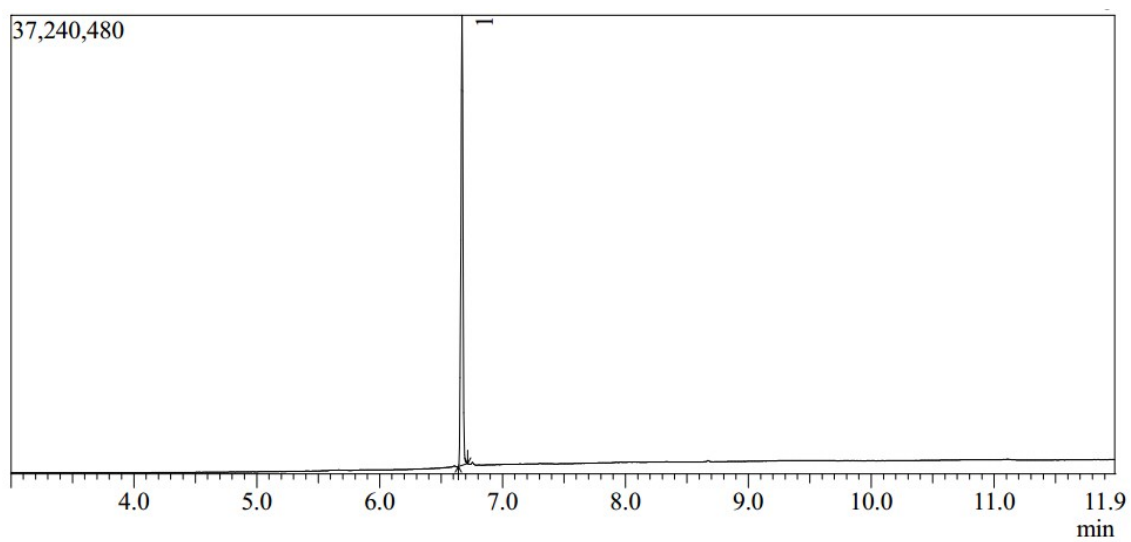

**Figure S2.** GC chromatogram of *(E)*-3-(2,6-difluorophenyl)-1-(4-fluorophenyl)prop-2-en-1-one.

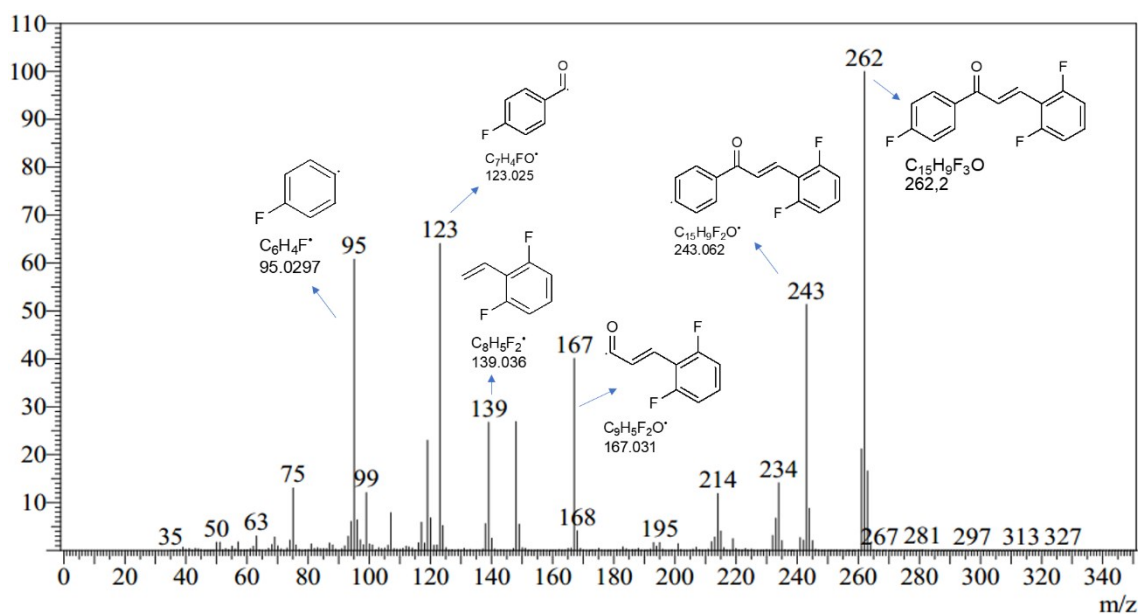

**Figure S3.** Mass scan spectrum of *(E)*-3-(2,6-difluorophenyl)-1-(4-fluorophenyl)prop-2-en-1-one.

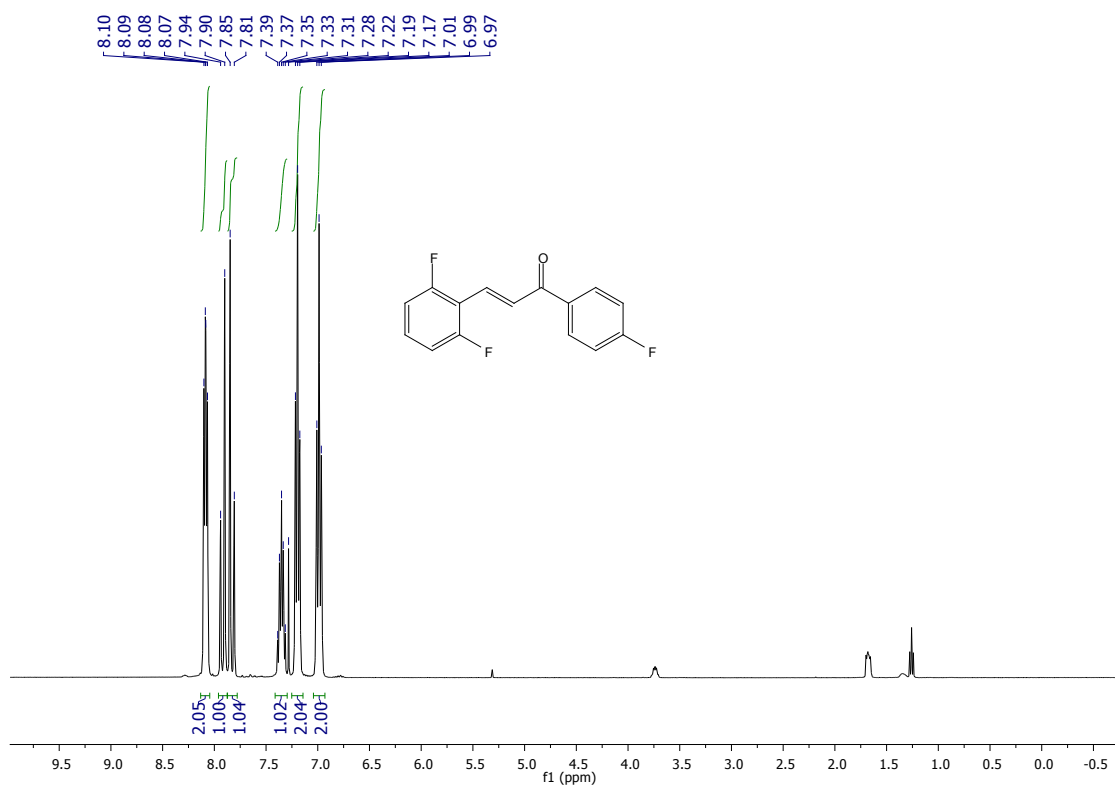

**Figure S4.**  $^1\text{H-NMR}$  of *(E)*-3-(2,6-difluorophenyl)-1-(4-fluorophenyl)prop-2-en-1-one (500 MHz,  $\text{CDCl}_3$ ).

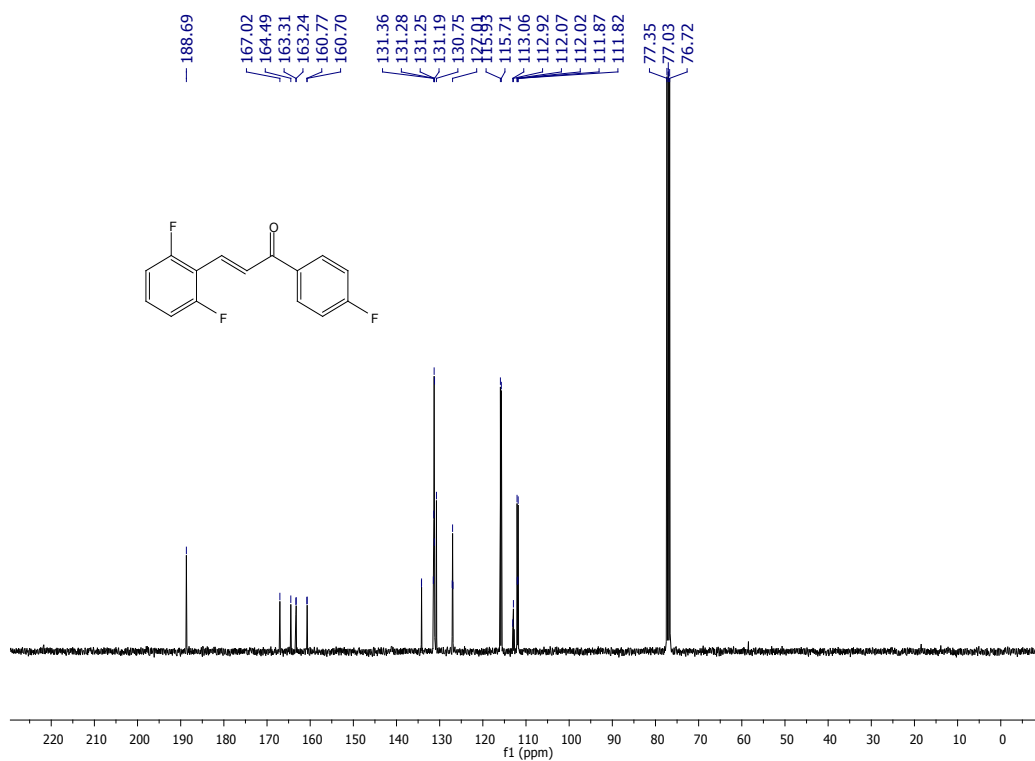

**Figure S5.** <sup>13</sup>C-NMR of *(E)*-3-(2,6-difluorophenyl)-1-(4-fluorophenyl)prop-2-en-1-one (126 MHz, CDCl<sub>3</sub>).

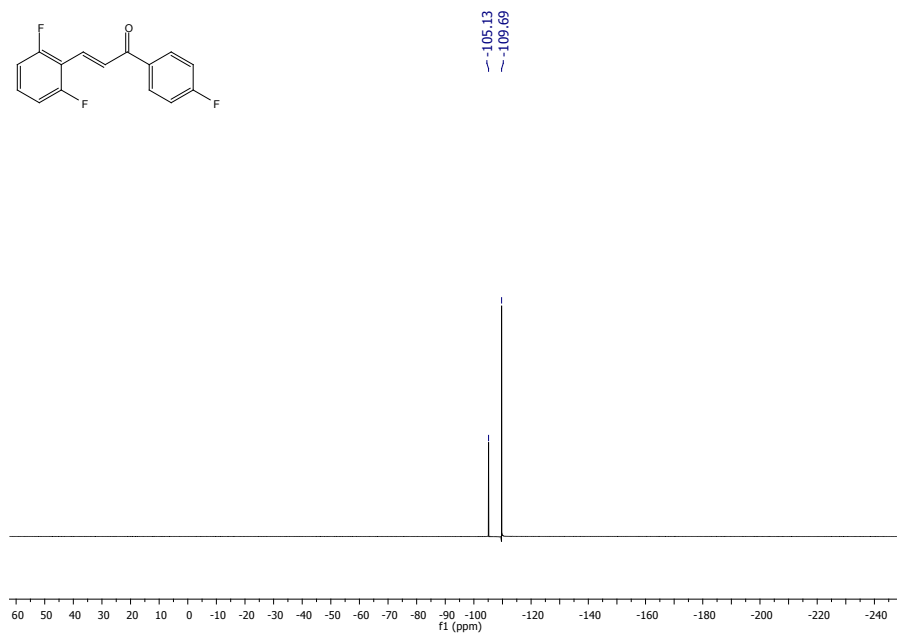

**Figure S6.** <sup>19</sup>F NMR of *(E)*-3-(2,6-difluorophenyl)-1-(4-fluorophenyl)prop-2-en-1-one (376 MHz, CDCl<sub>3</sub>).

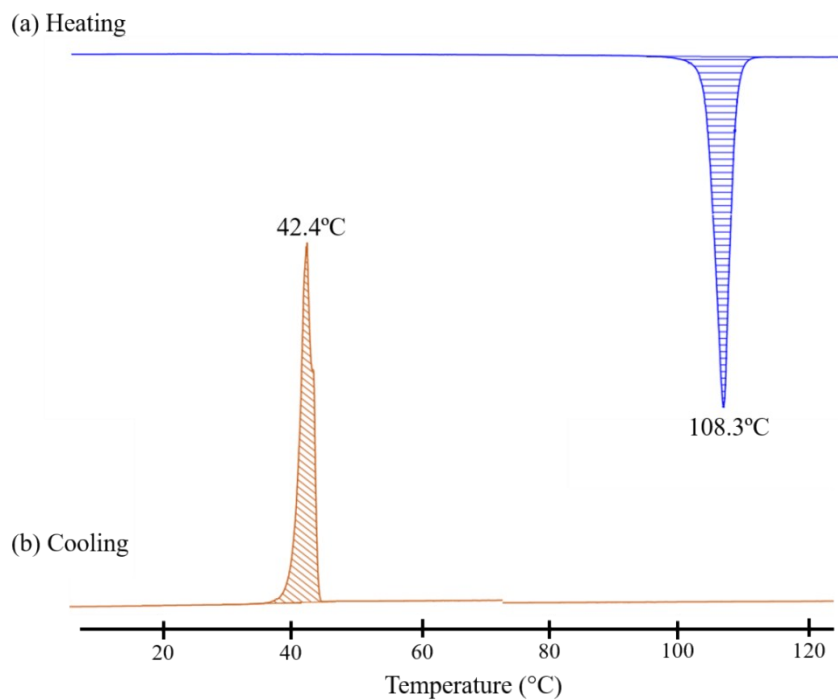

**Figure S7.** DSC thermogram of *(E)*-3-(2,6-difluorophenyl)-1-(4-fluorophenyl)prop-2-en-1-one.

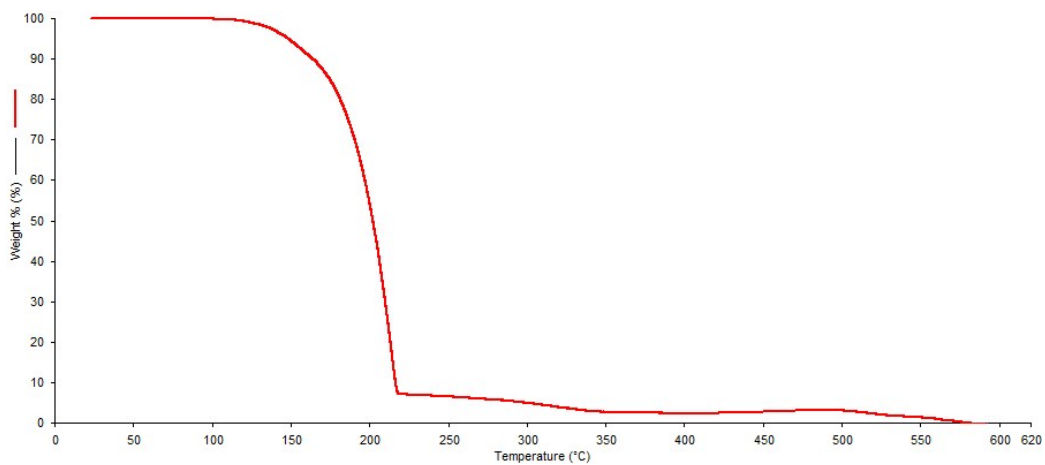

**Figure S8.** TGA thermogram of *(E)*-3-(2,6-difluorophenyl)-1-(4-fluorophenyl)prop-2-en-1-one.

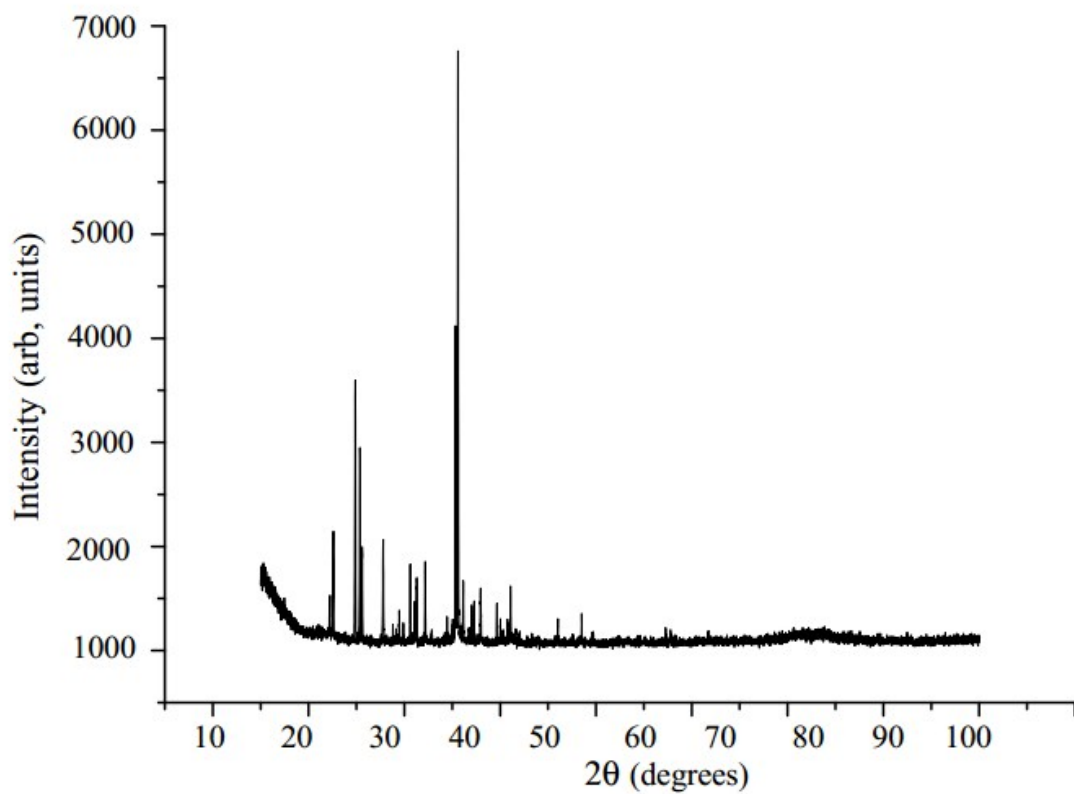

**Figure S9.** Powder diffraction patterns of *(E)*-3-(2,6-difluorophenyl)-1-(4-fluorophenyl)prop-2-en-1-one.

**Table S1:** Cartesian coordinates of the optimized structures using M062X exchange-correlation functional and basis set 6-311++G(d,p) for (*E*)-3-(2,6-difluorophenyl)-1-(4-fluorophenyl)prop-2-en-1-one.

| Atom | x           | y           | z           |
|------|-------------|-------------|-------------|
| F    | -1.77988000 | -2.07750900 | -0.30132300 |
| F    | -3.69902100 | 2.16856400  | 0.30642100  |
| F    | 6.20411700  | -1.08401600 | 0.11565900  |
| C    | -2.64381700 | 0.09418600  | 0.00062100  |
| C    | 2.41897800  | 0.48205700  | -0.02102800 |
| C    | -2.84955000 | -1.28029500 | -0.15847500 |
| O    | 0.95502700  | 2.32555100  | -0.09490200 |
| C    | -1.34757000 | 0.76950600  | 0.02436800  |
| H    | -1.38664200 | 1.84551100  | 0.16731900  |
| C    | 2.618703600 | -0.84781400 | 0.35471200  |
| H    | 1.78044700  | -1.47613100 | 0.63032900  |
| C    | -0.13122000 | 0.22581800  | -0.11141200 |
| H    | 0.01212800  | -0.83107800 | -0.27186700 |
| C    | 3.52464200  | 1.27712900  | -0.33778400 |
| H    | 3.35367800  | 2.31067100  | -0.61362700 |
| C    | -3.81711000 | 0.84415300  | 0.14715400  |
| C    | 3.89901000  | -1.38296800 | 0.41142700  |
| H    | 4.07999500  | -2.40764700 | 0.70907700  |
| C    | 4.96634500  | -0.56999600 | 0.07540000  |
| C    | 1.06350900  | 1.11795100  | -0.07135400 |
| C    | -4.09570100 | -1.87386000 | -0.17510700 |
| H    | -4.16475500 | -2.94594600 | -0.30309600 |
| C    | 4.80717900  | 0.75485700  | -0.30017700 |
| H    | 5.67770400  | 1.34698400  | -0.55231000 |
| C    | -5.22060700 | -1.07080000 | -0.02673600 |
| H    | -6.20616400 | -1.51854600 | -0.03845700 |
| C    | -5.08754800 | 0.30211900  | 0.13680100  |
| H    | -5.94101700 | 0.95616300  | 0.25456800  |
